# Supplementary material for: Shared probe design and existing microarray reanalysis using PICKY
Source: Springer Nature journal article supplement (doi:10.1186/1471-2105-11-196), 2010-04-20
Supplement: 12859_2009_3653_MOESM5_ESM.pdf [file 12859_2009_3653_MOESM5_ESM.pdf]

## Action

|                                    | 110                                                         | 120                                                     | 130        | 140 | 150          | 160 |
|------------------------------------|-------------------------------------------------------------|---------------------------------------------------------|------------|-----|--------------|-----|
| Gene685 has 167 overlaps with TEMP | TCTTCCGTCGCGTGCCACCTGGTCGATAGAATGAGCAGTTTGGTCGTCCCCATCTCGCC |                                                         |            |     |              |     |
| Gene657> 91.6                      | CCGTCGCGTGCCACCTGGTCGATAGAATGAGCAGTTTGGTCGTCCCCATC          |                                                         |            |     |              |     |
| Gene1113> 91.6                     | TCTT                                                        | CCGTCGCGTGCCACCTGGTCGATAGAATGAGCAGTTTGGTCGTCCCCATCTCGCC |            |     |              |     |
| Gene2212> 91.0                     | CCGTCGCGTGCCACCTGGTCGATAGAATGAGCAGTTTGGTCGTCCCCATC          |                                                         |            |     |              |     |
| Gene263> 64.9                      | CCGTCGCGTGCC                                                |                                                         |            |     |              |     |
| Gene689> 64.9                      | CCGTCGCGTGCC                                                |                                                         |            |     |              |     |
| Gene809> 64.9                      | CCGTCGCGTGCC                                                |                                                         |            |     |              |     |
| Gene1176> 64.9                     | CCGTCGCGTGCC                                                |                                                         |            |     |              |     |
| Gene1002< 64.4                     | GCCACCTGGTCGAT                                              |                                                         |            |     |              |     |
| Gene3176< 62.4                     | CCGTGCCACCTG                                                |                                                         |            |     |              |     |
| Gene992< 62.1                      | CGTCGCGTGCC                                                 |                                                         | TCGATAGAAT |     |              |     |
| Gene22> 62.0                       | CGCGTGCCACC                                                 |                                                         |            |     |              |     |
| Gene3348> 60.9                     | GCCACCTGGTCG                                                |                                                         |            |     |              |     |
| Gene3172> 60.0                     | TCGCGTGCCAC                                                 |                                                         |            |     |              |     |
| Gene3244< 57.0                     | CGTGCCACCTG                                                 |                                                         |            |     | GTCGTCCCCATC |     |
| Gene574> 56.9                      | CGTCGCGTGCC                                                 |                                                         |            |     |              |     |
| Gene724< 56.9                      | CGTCGCGTGCC                                                 |                                                         |            |     |              |     |
| Gene1062< 56.9                     | CGTCGCGTGCC                                                 |                                                         |            |     |              |     |
| Gene1478> 56.9                     | CGTCGCGTGCC                                                 |                                                         |            |     |              |     |
| Gene2171< 56.9                     | CGTCGCGTGCC                                                 |                                                         |            |     |              |     |
| Gene126< 56.7                      | CGCGTGCCAC                                                  |                                                         |            |     |              |     |
| Gene890< 56.7                      | CGCGTGCCAC                                                  |                                                         |            |     |              |     |
| Gene2205> 56.7                     | CGCGTGCCAC                                                  |                                                         |            |     |              |     |
| Gene762> 56.6                      | CCGTCGCGTGCC                                                |                                                         |            |     |              |     |
| Gene1905< 56.6                     | TCGCGTGCCA                                                  |                                                         |            |     |              |     |
| Gene2488< 56.6                     | TCGCGTGCCA                                                  |                                                         |            |     |              |     |
| Gene3032> 56.5                     | GGTCGTCCCCA                                                 |                                                         |            |     |              |     |
| Gene3233> 56.5                     | TGGTCGTCCCC                                                 |                                                         |            |     |              |     |
| Gene3260> 56.5                     | GGTCGTCCCCA                                                 |                                                         |            |     |              |     |
| Gene290> 56.4                      | CCGTCGCGTG                                                  |                                                         |            |     |              |     |
| Gene2927> 56.2                     | CGTGCCACCTG                                                 |                                                         |            |     |              |     |
| Gene559< 56.2                      | GTCGCGTGCC                                                  |                                                         |            |     |              |     |
| Gene2140< 56.2                     | GTCGCGTGCC                                                  |                                                         |            |     |              |     |
